# Supplementary material
Source: PubMed Central journal article supplement (PMC7213643)
Supplement: NIHMS1541057-supplement-1.pdf [file NIHMS1541057-supplement-1.pdf]

## Supplementary Material for

### Protein Structure Prediction Assisted with Sparse NMR Data in CASP13

Davide Sala<sup>#</sup>, Yuanpeng Janet Huang<sup>#</sup>, Casey A. Cole, David Snyder, Gaohua Liu, Yojiro Ishida, G.V.T. Swapna, Kelly P. Brock, Chris Sander, Krzysztof Fidelis, Andriy Kryshatafovych, Masayori Inouye, Roberto Tejero, Homayoun Valafar, Antonio Rosato\*, Gaetano T. Montelione\*

<sup>#</sup> co-first author

\* co-submitting authors

#### Production and Solution NMR Structure Determination of Target 1008 (foldit3).

The synthetic gene for foldit3 [26] without ACA sequences [27, 28 ] was obtained from Genscript already incorporated into plasmid pET15TEV\_NESG, which includes a N-terminal 6xHis purification tag, followed by a TEV protease cleavage site (sequence ‘MGHHHHHHGWSENLYFQGS’). For these NMR studies, this affinity purification tag was not removed. Sample preparation followed standard protocols, as outlined in the previous publication on foldit3 [26]. *E. coli* BL21(DE3) cells harboring plasmid pET15TEV\_NESG-foldit3 were grown in 1 L MJ9 minimal media [78], supplemented with 100  $\mu$ g/ml ampicillin at 37 °C. In order to produce uniformly <sup>15</sup>N and <sup>13</sup>C enriched protein samples, 1g / L <sup>15</sup>NH<sub>4</sub>-salts and 2g / L U-<sup>13</sup>C glucose were added as sole a nitrogen and a carbon sources, respectively. When O.D.<sub>600</sub> reached around 0.5 units, the culture was transferred to 18 °C, and the protein production was induced by addition of 1 mM IPTG. After overnight incubation, the cells were collected and resuspended in 20 ml binding buffer, containing 20 mM Tris-HCl pH 8.0, 500 mM NaCl and 20 mM imidazole. After passing the cells through a 16,000-17,000 psi French press twice, cell debris were removed by 10,000 rpm for 30 min. The supernatant was further spun down at 40,000 rpm for 1 hr. The obtained supernatant (soluble fraction) was mixed with 1 mL of Ni-resin and incubated at 4 °C for 1 hr. The non-specific binding proteins were removed by 20 mL binding buffer and washing buffer, containing 20 mM Tris-HCl pH 8.0, 500 mM NaCl and 50 mM imidazole, and the target protein was eluted by 5 mL elution buffer (20 mM Tris-HCl pH 8.0, 500 mM NaCl and 300 mM imidazole). The protein was dialyzed against gel filtration buffer, containing 20 mM Tris-HCl pH 8.0, 100 mM NaCl), overnight, and gel filtration was carried out using AKTA Express purification system with high-load 26/600 Superdex 200 pg column. Homogeneity (> 97%) was validated by SDS polyacrylamide gel electrophoresis. The purified protein was dialyzed against 20 mM potassium phosphate (pH 6.5), and the protein concentration was adjusted to between 0.3-0.4 mM for NMR studies.

**Supplementary Table S1.** Statistics for Real and Simulated NMR Data for NMR-Assisted CASP13 Targets

| Target          | Data available                                        | No. of residues | Assessment Units | No. of peaks in the final list | No. of peaks not assignable | No. of peaks per residue | No. of peaks removed | No. of residues for which resonance assignments were deleted before NOESY simulation | No. of residues for which resonance assignments were deleted after NOESY simulation |
|-----------------|-------------------------------------------------------|-----------------|------------------|--------------------------------|-----------------------------|--------------------------|----------------------|--------------------------------------------------------------------------------------|-------------------------------------------------------------------------------------|
| <b>N1008</b>    | Only backbone resonance assignments, dihedrals        | 80              | N1008            | 665                            | 163<br>(19.7%)              | 8.4                      | N/A                  | 0                                                                                    | 0                                                                                   |
| <b>n1008</b>    | Essentially complete resonance assignments, dihedrals | 80              | n1008-D1         | 3422                           | 6<br>(0.2%)                 | 43.3                     | N/A                  | 0                                                                                    | 0                                                                                   |
| <b>N1005</b>    | simNOE, dihedrals, 2x RDC's                           | 326             | N1005            | 4367                           | 342<br>(7.3%)               | 12.6                     | 245<br>(5.2%)        | 83                                                                                   | 46                                                                                  |
| <b>N0980s1</b>  | simNOE, dihedrals, 2x RDC's                           | 105             | N0980s1          | 623                            | 41<br>(6.2%)                | 5.1                      | 89<br>(13.4%)        | 24                                                                                   | 15                                                                                  |
| <b>N0989</b>    | simNOE, dihedrals, 2x RDC's                           | 246             | N0989-D1.D2      | 1407                           | 119<br>(7.8%)               | 9.3                      | 157<br>(10.3%)       | 56                                                                                   | 35                                                                                  |
| <b>N0981-D1</b> | simNOE, dihedrals, 2x RDC's                           | 132             | N0989-D1         |                                |                             |                          |                      |                                                                                      |                                                                                     |
| <b>N0981-D2</b> | simNOE, dihedrals, 2x RDC's                           | 134             | N0989-D2         |                                |                             |                          |                      |                                                                                      |                                                                                     |
| <b>N0981-D3</b> | simNOE, dihedrals, 2x RDC's                           | 86              | N0989-D1         | 349                            | 31<br>(8.2%)                | 3.5                      | 48<br>(12.6%)        | 28                                                                                   | 14                                                                                  |
| <b>N0981-D4</b> | simNOE, dihedrals, 2x RDC's                           | 80              | N0989-D2         | 359                            | 36<br>(9.1%)                | 3.6                      | 70<br>(17.7%)        | 28                                                                                   | 14                                                                                  |
| <b>N0981-D5</b> | simNOE, dihedrals, 2x RDC's                           | 203             | N0981-D3         | 1186                           | 106<br>(8.2%)               | 5.1                      | 155<br>(12.0%)       | 50                                                                                   | 36                                                                                  |
| <b>N0968s2</b>  | simNOE, dihedrals, 2x RDC's                           | 111             | N0981-D4         | 553                            | 41<br>(6.9%)                | 4.4                      | 68<br>(11.4%)        | 29                                                                                   | 18                                                                                  |
| <b>N0957s1</b>  | simNOE, dihedrals, 2x RDC's                           | 127             | N0981-D5         | 698                            | 59<br>(7.8%)                | 4.7                      | 97<br>(12.8%)        | 30                                                                                   | 19                                                                                  |
| <b>N0968s1</b>  | simNOE, dihedrals, 2x RDC's                           | 116             | N0968s2          | 592                            | 41<br>(6.5%)                | 4.5                      | 67<br>(10.6%)        | 30                                                                                   | 18                                                                                  |
| <b>N0957s1</b>  | simNOE, dihedrals, 2x RDC's                           | 123             | N0968s1          | 751                            | 52<br>(6.5%)                | 5.4                      | 83<br>(10.3%)        | 32                                                                                   | 20                                                                                  |
| <b>N0957s1</b>  | simNOE, dihedrals, 2x RDC's                           | 163             | N0957-D1.D2      | 1123                           | 105<br>(8.6%)               | 5.9                      | 165<br>(13.4%)       | 40                                                                                   | 20                                                                                  |
| <b>N0957s1</b>  | simNOE, dihedrals, 2x RDC's                           | 108             | N0957-D1         |                                |                             |                          |                      |                                                                                      |                                                                                     |
| <b>N0957s1</b>  | simNOE, dihedrals, 2x RDC's                           | 54              | N0957-D2         |                                |                             |                          |                      |                                                                                      |                                                                                     |

Data (real or simulated) provided for each target are listed in the second column. NOESY peaks which cannot be accounted by combined analysis of the chemical shift list and the coordinates of the reference structure are not assignable. The number of residues deleted either before simulating the NOESY peak list, or after simulating the NOESY peak list, are reported in the last two columns, respectively.

**Supplementary Table S2. Correlation Coefficients Between Various CASP13 Metrics.**

|                 | <u>GDT HA</u> | <u>GDT SC</u> | <u>RPF</u> | <u>SphGrdr</u> | <u>CAD AA</u> | <u>MolPrbty</u> |
|-----------------|---------------|---------------|------------|----------------|---------------|-----------------|
| <u>GDT HA</u>   |               | 0.959         | 0.923      | 0.907          | 0.929         | 0.518           |
| <u>GDT SC</u>   | 0.952         |               | 0.902      | 0.891          | 0.937         | 0.521           |
| <u>RPF</u>      | 0.918         | 0.902         |            | 0.952          | 0.969         | 0.557           |
| <u>SphGrdr</u>  | 0.901         | 0.895         | 0.947      |                | 0.927         | 0.555           |
| <u>CAD AA</u>   | 0.915         | 0.932         | 0.966      | 0.920          |               | 0.588           |
| <u>MolPrbty</u> | 0.546         | 0.554         | 0.573      | 0.562          | 0.610         |                 |

Friedman's Test indicates, aside from the MolProbity packing metric, different scoring techniques do not give significantly different rankings. Upper right – Pearson coefficient.  
Lower left – Spearman coefficient.

**Supplementary Table S3. Principal Component Analysis of Key Structure Assessment Metrics**

| <b><u>Component</u></b> | <b><u>GDT HA</u></b> | <b><u>GDT SC</u></b> | <b><u>RPF</u></b> | <b><u>SphGrdr</u></b> | <b><u>CAD AA</u></b> | <b><u>MolPrbty</u></b> | <b><u>% Variance Explained</u></b> |
|-------------------------|----------------------|----------------------|-------------------|-----------------------|----------------------|------------------------|------------------------------------|
| <b>1</b>                | 0.442                | 0.449                | 0.425             | 0.428                 | 0.433                | 0.227                  | 86.702                             |
| <b>2</b>                | -0.146               | -0.188               | -0.067            | -0.056                | -0.040               | 0.966                  | 8.351                              |
| <b>3</b>                | -0.388               | -0.562               | 0.389             | 0.608                 | 0.050                | -0.104                 | 2.511                              |
| <b>4</b>                | -0.371               | -0.034               | 0.373             | -0.567                | 0.632                | -0.044                 | 1.331                              |
| <b>5</b>                | 0.655                | -0.548               | 0.380             | -0.319                | -0.156               | -0.007                 | 0.800                              |
| <b>6</b>                | 0.256                | -0.383               | -0.616            | 0.145                 | 0.621                | -0.044                 | 0.306                              |

**Supplemental Table S4: NMR Data and Refinement Statistics for Foldit3 [26]****Summary of conformationally-restricting experimental restraints <sup>a</sup>***NOE-based distance restraints:*

|                                                    |      |
|----------------------------------------------------|------|
| Total                                              | 1725 |
| intra-residue [ $i = j$ ]                          | 448  |
| sequential [ $ i - j  = 1$ ]                       | 441  |
| medium range [ $1 <  i - j  < 5$ ]                 | 344  |
| long range [ $ i - j  \geq 5$ ]                    | 492  |
| NOE restraints per restrained residue <sup>b</sup> | 21.3 |

*Hydrogen bond restraints:*

|                                 |    |
|---------------------------------|----|
| Total                           | 66 |
| long range [ $ i - j  \geq 5$ ] | 22 |

*Dihedral-angle restraints:* 118

*Total number of restricting restraints <sup>b</sup>* 1909

*Total number of restricting restraints per restrained residue <sup>b</sup>* 23.6

*Restricting long-range restraints per restrained residue <sup>b</sup>* 6.3

**Total structures computed** 100

**Number of structures used** 20

**Residual constraint violations <sup>a,c</sup>***Distance violations / structure*

|                                         |        |
|-----------------------------------------|--------|
| 0.1 - 0.2 Å                             | 10.05  |
| 0.2 - 0.5 Å                             | 2.35   |
| > 0.5 Å                                 | 0      |
| RMS of distance violation / restraint   | 0.01 Å |
| Maximum distance violation <sup>d</sup> | 0.42 Å |

*Dihedral angle violations / structure*

|                                               |        |
|-----------------------------------------------|--------|
| 1 - 10 °                                      | 17     |
| > 10 °                                        | 0      |
| RMS of dihedral angle violation / restraint   | 1.12 ° |
| Maximum dihedral angle violation <sup>d</sup> | 8.40 ° |

**RPF scores**

| Recall | Precision | F-measure | DP-score |
|--------|-----------|-----------|----------|
| 0.945  | 0.956     | 0.95      | 0.842    |

**RMSD Values**

|                    | all   | ordered <sup>e</sup> | Selected <sup>f</sup> |
|--------------------|-------|----------------------|-----------------------|
| All backbone atoms | 6.9 Å | 0.6 Å                | 0.6 Å                 |
| All heavy atoms    | 7.7 Å | 1.1 Å                | 1.1 Å                 |

**Structure Quality Factors**

Mean score SD Z-score <sup>g</sup>

|                                                      |       |        |       |
|------------------------------------------------------|-------|--------|-------|
| Procheck G-factor <sup>e</sup> (phi / psi only)      | -0.18 | N/A    | -0.39 |
| Procheck G-factor <sup>e</sup> (all dihedral angles) | -0.21 | N/A    | -1.24 |
| Verify3D                                             | 0.25  | 0.0282 | -3.37 |
| ProsaII (-ve)                                        | 0.87  | 0.0739 | 0.91  |
| MolProbity clashscore                                | 4.97  | 2.6461 | 0.67  |

**General linear model RMSD prediction** 1.14 Å

**Ramachandran Plot Summary from Procheck <sup>f</sup>**

|                              |       |
|------------------------------|-------|
| Most favored regions         | 94.4% |
| Additionally allowed regions | 5.5%  |
| Generously allowed regions   | 0.1%  |
| Disallowed regions           | 0.0%  |

**Ramachandran Plot Statistics from Richardson's lab**

|                      |       |
|----------------------|-------|
| Most favored regions | 97.3% |
| Allowed regions      | 2.5%  |
| Disallowed regions   | 0.1%  |

---

<sup>a</sup> Analyzed for residues 1 to 97, Including N-terminal purification tag.

<sup>b</sup> There are 81 residues with conformationally-restricting restraints.

<sup>c</sup> Calculated for all restraints for the given residues, using sum over  $r^{-6}$

<sup>d</sup> Largest restraint violation among all the reported structures.

<sup>e</sup> Residues with sum of phi and psi order parameters > 1.8.

*Ordered residue ranges: 21A-45A,48A-54A,57A-78A,80A-87A,90A-96A*

<sup>f</sup> Residues selected based on: dihedral angle order parameter, with  $S(\phi)+S(\psi) \geq 1.8$

*Selected residue ranges: 21A-45A,48A-54A,57A-78A,80A-87A,90A-96A*

<sup>g</sup> With respect to mean and standard deviation for for a set of 252 X-ray structures < 500 residues, of resolution  $\leq 1.80$  Å, R-factor  $\leq 0.25$  and R-free  $\leq 0.28$ ; a positive value indicates a 'better' score

Generated using PSVS 1.5

**Supplementary Table S5. Assessment of Contact Ambiguity**

|                                  | <b>No. of Residues</b> | <b>No. of Possible Contacts</b> | <b>Average Ambiguity per Contact</b> | <b>Maximum Ambiguity per Contact</b> | <b>Unique Long-range Contacts Total / Per Residue</b> | <b>Unique Long-range H<sup>N</sup>-H<sup>N</sup> Contacts Total / Per Residue</b> |
|----------------------------------|------------------------|---------------------------------|--------------------------------------|--------------------------------------|-------------------------------------------------------|-----------------------------------------------------------------------------------|
| <b><u>Simulated NMR Data</u></b> |                        |                                 |                                      |                                      |                                                       |                                                                                   |
| N0957s1                          | 163                    | 5582                            | 5                                    | 50                                   | 110 / 0.67                                            | 39 / 0.24                                                                         |
| N0968s1                          | 123                    | 1506                            | 2                                    | 16                                   | 138 / 1.12                                            | 29 / 0.24                                                                         |
| N0968s2                          | 115                    | 2088                            | 4                                    | 32                                   | 93 / 0.81                                             | 51 / 0.44                                                                         |
| N0980s1                          | 105                    | 1489                            | 3                                    | 18                                   | 92 / 0.88                                             | 34 / 0.32                                                                         |
| N0981-D1                         | 86                     | 538                             | 2                                    | 10                                   | 126 / 1.47                                            | 44 / 0.51                                                                         |
| N0981-D2                         | 80                     | 504                             | 2                                    | 8                                    | 127 / 1.59                                            | 60 / 0.75                                                                         |
| N0981-D3                         | 203                    | 4701                            | 4                                    | 32                                   | 193 / 0.95                                            | 67 / 0.33                                                                         |
| N0981-D4                         | 111                    | 1093                            | 2                                    | 10                                   | 100 / 0.90                                            | 49 / 0.44                                                                         |
| N0981-D5                         | 127                    | 1983                            | 3                                    | 21                                   | 135 / 1.06                                            | 74 / 0.58                                                                         |
| N0989                            | 246                    | 7095                            | 5                                    | 90                                   | 200 / 0.81                                            | 91 / 0.37                                                                         |
| N1005                            | 326                    | 49,887                          | 11                                   | 92                                   | 263 / 0.81                                            | 90 / 0.28                                                                         |
| <b><u>Real NMR Data</u></b>      |                        |                                 |                                      |                                      |                                                       |                                                                                   |
| N1008                            | 97 <sup>a</sup>        |                                 | 5                                    | 54                                   | 53 / 0.54                                             | 27 / 0.28                                                                         |
| n1008                            | 97 <sup>a</sup>        |                                 | 9                                    | 169                                  | 200 / 2.06                                            | 19 / 0.20                                                                         |

<sup>a</sup>Statistics for target 1008 include the N-terminal 17-residue polypeptide tail.

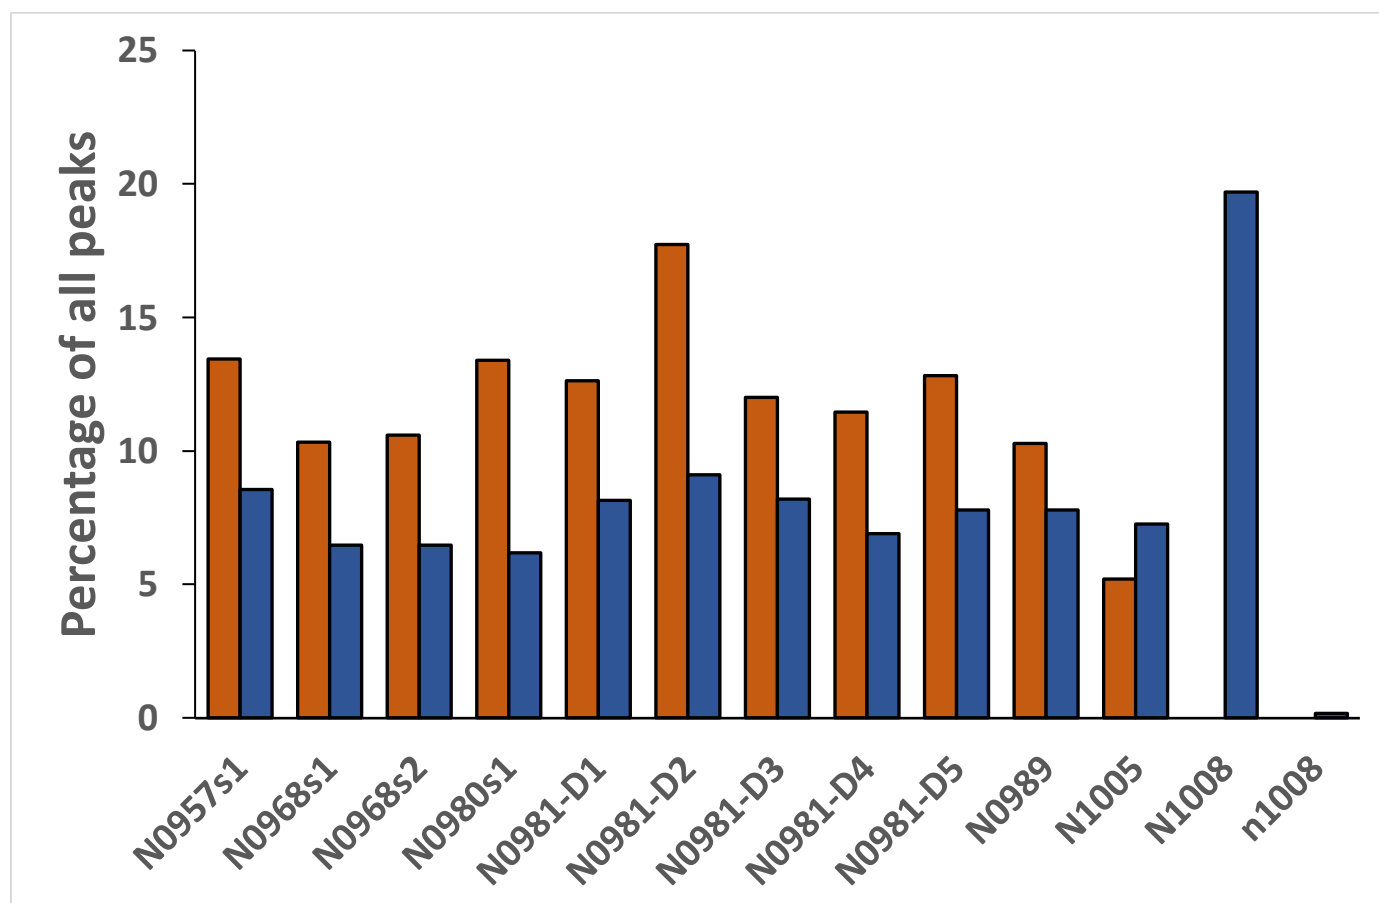

**Supplementary Fig. S1. Analysis of NOESY peak lists against the reference atomic coordinates.** Orange bars – percentage of all possible NOESY peaks that are removed by simulated deletions of “exchange broadened” resonances from the resonance assignment list. Blue bars – Percentage of all NOESY peaks in the real or simulated spectra that cannot be correctly assigned based on the information provided in the Ambiguous Contact Lists. “Unassignable peaks” arise either from noise peaks, which do not correspond to a true NOE interaction, or for real NOESY peaks when the true resonance that gives rise the cross peak is not assigned in the chemical shift list, leading to erroneous assignments of the NOESY cross peak. This problem is particularly severe for data set N1008 in which many sidechain-backbone NOEs are present in the NOESY peak list, but no sidechain assignments are available in the chemical shift list.



| Residue 1 | Residue 2 | Peak No.  | Upper-bound |               | Atom 1    | Atom 2    |
|-----------|-----------|-----------|-------------|---------------|-----------|-----------|
| <b>R1</b> | <b>R2</b> | <b>P#</b> | <b>UPL</b>  | <b>Confid</b> | <b>A1</b> | <b>A2</b> |
| 79        | 77        | 17        | 5.0         | 0.95          | H         | H         |
| 79        | 177       | 20        | 6.0         | 0.67          | H         | HD2       |
| 79        | 135       | 20        | 6.0         | 0.97          | H         | HD1       |
| 79        | 249       | 20        | 6.0         | 0.96          | H         | HD1       |
| 79        | 50        | 20        | 6.0         | 0.81          | H         | HD2       |
| 79        | 217       | 23        | 5.0         | 0.68          | H         | H         |
| 79        | 230       | 23        | 5.0         | 0.75          | H         | H         |
| 79        | 232       | 23        | 5.0         | 0.72          | H         | H         |
| 79        | 106       | 23        | 5.0         | 0.76          | H         | H         |
| 79        | 166       | 23        | 5.0         | 0.83          | H         | H         |
| 79        | 100       | 23        | 5.0         | 0.83          | H         | H         |
| 79        | 82        | 23        | 5.0         | 0.74          | H         | H         |
| 79        | 246       | 23        | 5.0         | 0.71          | H         | H         |
| 79        | 216       | 23        | 5.0         | 0.67          | H         | H         |
| 45        | 37        | 28        | 7.5         | 0.84          | HD2       | HG1       |

**Supplementary Fig. S2. Format of Ambiguous Contact Lists.** These data were provided in place of NOESY peak list data to CASP13 predictors. For each peak in the  $^{15}\text{N}$ -edited or  $^{13}\text{C}$ -edited 3D NOESY peak list (column P#), a set of ambiguous contacts were determined based on the simulated chemical shift list, using the Cycle 0 protocol of the NOESY peak assignment program *ASDP*. Possible contacts are listed between H atom 1 (Residue number R1, and Atom A1), and H atom 2 (Residue number R2, and Atom A2), together with an upper bound distance (UPL) in Å. Early Ambiguous Contact Lists included an assignment confidence score (Confid) ranging from 0 to 1, based on the quality of the match between the chemical shift values of the NOESY peak and the chemical shift values of candidate interacting atoms in the resonance assignment list. Since the Confid score was not used in CASP11, it was phased out of use during CASP13. Atom types include amide  $\text{H}^{\text{N}}$  protons (H) and various methyl proton groups (HB, HG1, HG2, HD1, HD2, etc). In this example, *ASDP* has uniquely assigned peak P# 20 to an interaction between the amide  $\text{H}^{\text{N}}$  of residue 77 and the amide  $\text{H}^{\text{N}}$  of residue 79, while peak P# 20 has four ambiguous assignments,  $\text{H}^{\text{N}}$  of residue 79 and methyl resonances of residues 177, 135, 249, and 50

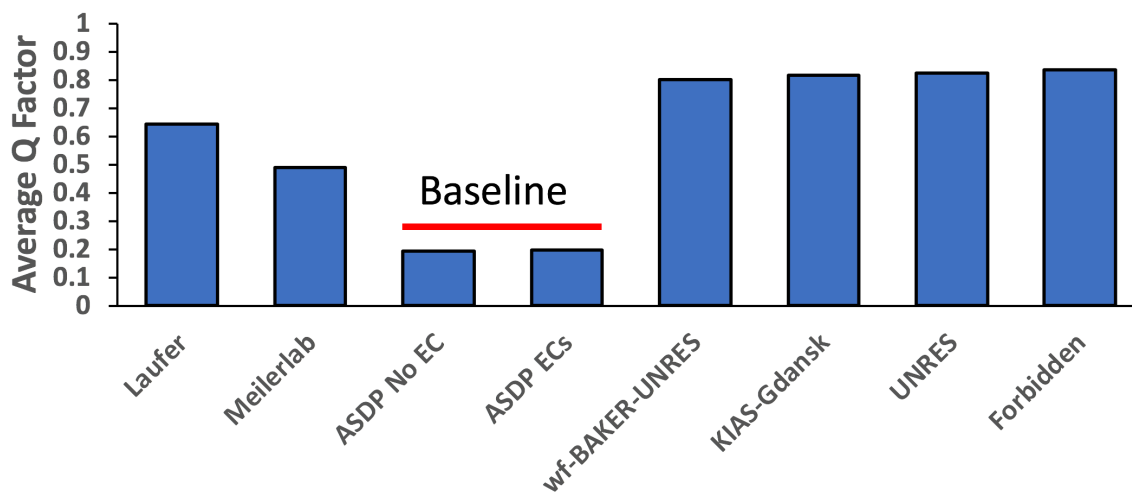

**Supplemental Fig. S3.** Average  $^{15}\text{N}$ - $^1\text{H}$  RDC Q-Factors, averaged over submitted evaluation units, for each predictor group.

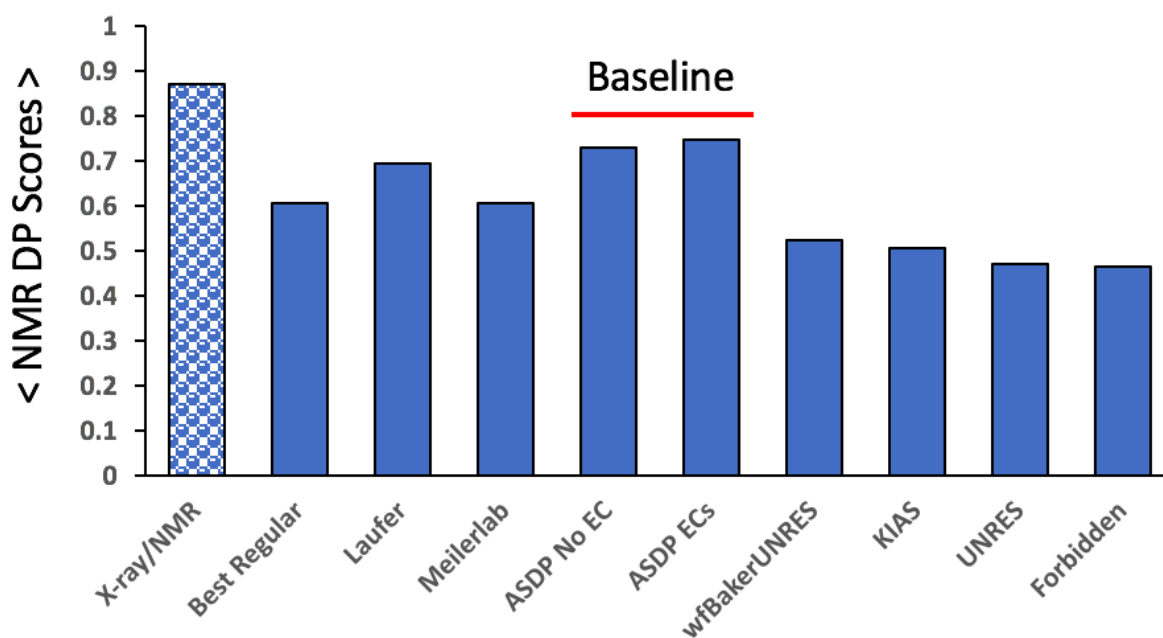

**Supplemental Fig. S4.** NMR DP scores, averaged over submitted first-ranked models, for each predictor group.

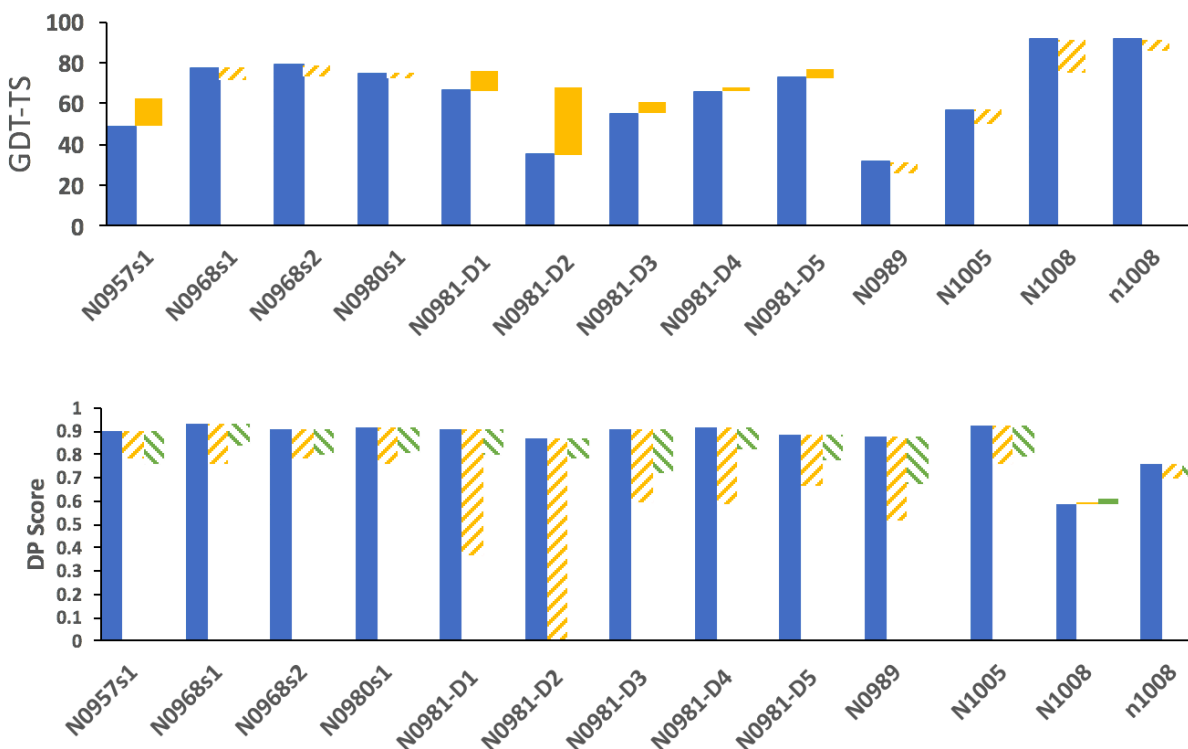

**Supplementary Fig. S5. NMR DP Scores for X-ray Crystal Structures, Experimental NMR Structures Compared with Best Regular or Best NMR-Assisted Models.** Top (same data as main text Fig 7A): GDT-TS scores for the “best” model submitted by any NMR-assisted prediction group (blue bars) compared with the “best” model submitted by any regular prediction group (yellow solid bars show improved accuracy, and hashed yellow bars show average accuracy, due to addition of sparse NMR data). Bottom: DP scores for experimental structures determined by X-ray or NMR (blue bars) compared with the “best” model submitted by any regular prediction group (yellow bars) and the “best” model submitted by any NMR-assisted prediction group (green bars). Hashed yellow or green bars indicate targets are less accurate than the experimental structures, while solid yellow or green bars indicate targets are more accurate.
